# Supplementary material
Source: PubMed Central journal article supplement (PMC3475193)
Supplement: supp_WNL.0b013e3181a6b325_hardin3.pdf [file supp_WNL.0b013e3181a6b325_hardin3.pdf]

# Uygulama Parametreleri güncellemesi: Epilepsili kadınlara yaklaşım konusu—Gebeliğe odaklanma (bir kanıta dayalı derleme): Vitamin K, folik asit, kan düzeyleri ve emzirme

Amerikan Nöroloji Akademisi ve Amerikan Epilepsi Derneği'nin Kalite Standartları Alt Komitesi ve Tedavi ve Teknoloji Değerlendirme Alt Komitesi'nin Raporu

C.L. Harden, MD  
P.B. Pennell, MD  
B.S. Koppel, MD  
C.A. Hovinga, PharmD  
B. Gidal, PharmD  
K.J. Meador, MD  
J. Hopp, MD  
T.Y. Ting, MD  
W.A. Hauser, MD  
D. Thurman, MD, MPH  
P.W. Kaplan, MB, FRCP  
J.N. Robinson, MD  
J.A. French, MD  
S. Wiebe, MD  
A.N. Wilner, MD  
B. Vazquez, MD  
L. Holmes, MD  
A. Krumholz, MD  
R. Finnell, PhD  
P.O. Shafer, RN, MN  
C. Le Guen

Yazışma adresi ve reprint istekleri için American Academy of Neurology, 1080 Montreal Avenue, St. Paul, MN 55116  
guidelines@aan.com

Ek veriler için  
www.neurology.org

Bakınız sayfa 307 ve 314

## ÖZET

**Amaç:** Epilepsili kadınların (EK) gebelik esnasında bakımıyla ilgili, gebe kalma öncesi folik asit kullanımı, prenatal vitamin K kullanımı, yenidoğanların kanama hastalığı riski, antiepileptik ilaçların (AEI) plasentadan ve sütte geçişinin klinik anlamları, emzirme riskleri ve gebelik esnasında AEI düzeylerindeki değişim gibi, tedavi sorunlarının kanıtlarını tekrar değerlendirmek.

**Yöntemler:** Yirmi üyeli bir komite tarafından, 1985 ve Ekim 2007 tarihleri arasında yapılandırılmış literatür derlemeleri ve ilgili makalelerin sınıflamasından elde edilen kanıtlar değerlendirildi.

**Bulgular:** AEI alan EK'ye yapılacak prekonsepsiyonel folik asit desteği, yenidoğanda önemli konjenital malformasyonların önlenmesinde muhtemelen etkilidir. AEI alan EK'nin yenidoğanlarında kanama komplikasyon riskinin anlamlı ölçüde arttığını düşündürecek yeterli kanıt yoktur. Pirimidon ve levetirasetam süttten klinik olarak önemli olabilecek miktarda geçebilir. Valproat, fenobarbital, fenitoin ve karbamazepin süttten klinik olarak önemli olabilecek miktarda geçemez. Gebelik lamotrijin, fenitoin ve daha küçük boyutta olmak üzere karbamazepin klirensinde muhtemel artışa ve konsantrasyonunda azalmaya neden olur ve levetirasetam ve aktif okskarbazepin metaboliti olan monohidroksi türevi düzeyinde muhtemelen azalma gerçekleşir.

**Öneriler:** Epilepsili kadınların en az 0.4 mg prekonsepsiyonel folik asitle desteklenmesi önerilebilir (Düzyey C). Gebelik esnasında lamotrijin, karbamazepin ve fenitoin düzeylerinin monitorize edilmesi gereklidir (Düzyey B), levetirasetam ve okskarbazepin (monohidroksi türevleri gibi) düzeyleri de monitorize edilebilir (Düzyey C). Kanıtların azlığı birçok tavsiyenin gücünü sınırlamıştır. *Neurology*® 2009;73:142-149

## SÖZLÜK

**AAN** = American Academy of Neurology; **AEI** = antiepileptik ilaç; **CBZ** = karbamazepin; **CI** = güven aralığı; **ESM** = etosüksimid; **GBP** = gabapentin; **LTG** = lamotrijin; **LVT** = levetirasetam; **MHD** = monohidroksi türevi; **OR** = olasılık oranı; **OXC** = okskarbazepin; **PB** = fenobarbital; **PHT** = fenitoin; **PRM** = pirimidon; **TPM** = topiramet; **VPA** = valproat; **EK** = epilepsili kadınlar.

Son ABD popülasyon tahminleri<sup>1</sup> ve epilepsi prevalansı<sup>2</sup> yaklaşık yarım milyon epilepsili kadının (EK) çocuk doğurma yaşında olduğunu göstermektedir. Aynı zamanda, her 1000 doğum yapan kadından 3-5'inin EK olduğu da tahmin edilmektedir.<sup>3</sup> Epilepsi, tetiklenmemiş nöbetlerle ve tedavide tipik olarak günlük, uzun vadeli antiepileptik ilaç (AEI) rejimi kulla-

nılmasıyla tanımlanır. Epilepsili kişilerin büyük kısmında nöbetler kontrollü ve kişi sağlıklıdır ve dolayısı ile çocuk doğurma dahil, her türlü normal yaşam faaliyetini gerçekleştirmeleri beklenir.

Bu parametrede, gebe kalan veya gebelik planlayan EK'nin klinik bakımı hakkında altı genel klinik soruya dair kanıtlar özetlenmiştir:

27 Nisan 2009'da [www.neurology.org](http://www.neurology.org) adresinde elektronik olarak yayımlanmıştır.

Eş zamanlı olarak *Epilepsia* dergisinde de yayınlanmıştır.

Yazarların bağlı bulunduğu kuruluşlar makalenin sonunda listelenmiştir.

The Mission Statements of the Quality Standards Subcommittee (QSS) and Therapeutics and Technology Assessment (TTA) Subcommittee, Conflict of Interest Statement, QSS members, TTA members, AAN classification of evidence, Classification of Recommendations (ek e-1-e-5) yanında tablo e-1-e-4, *Neurology*® Web sitesi [www.neurology.org](http://www.neurology.org)'da ek veriler sunulmuştur.

Quality Standards Subcommittee tarafından 5 Kasım 2008'de; Therapeutics and Technology Assessment Subcommittee tarafından 15 Kasım 2008'de; Practice Committee tarafından 18 Aralık 2008'de ve AAN Board of Directors tarafından 25 Mart 2009'da onaylanmıştır.

Milken Family Foundation tarafından desteklenmiştir.

*Beyan:* Yazarların beyanları makalenin sonunda verilmiştir.

1. Prekonsepsiyonel folik asit desteği AEİ alan EK'lerin yenidoğanlarında doğum defekti riskini düşürür mü?
2. AEİ alan EK'nin yenidoğanlarında kanama hastalığı riski nedir?
3. Prenatal vitamin K desteği, AEİ alan EK'nin yenidoğanlarında kanama hastalığı riskini düşürür mü?
4. Annenin aldığı AEİ plasentaya veya süte geçer mi?
5. Annenin aldığı AEİ'ye dolaylı maruziyet, yenidoğanlarda semptomatik etki riskini artırır mı?
6. EK'de gebelik esnasında AEİ düzeyleri değişir mi?

**ANALİTİK SÜRECİN TANIMI** Panel formasyonu, literatür araştırma stratejisi ve literatürün analitik süreci EK'de obstetrik komplikasyonlar ve nöbet sıklığı değişimine dair hazırlanmış eş makalede tanımlanmıştır.<sup>4</sup>

**KANIT ANALİZİ** Prekonsepsiyonel folik asit desteği, AEİ alan EK'nin yenidoğanlarında doğum defekti riskini azaltır mı? Analize dahil edilebilmek için, makalelerin prekonsepsiyonel folik asit kullanımı ile önemli konjenital malformasyon (ÖKM) sonucu arasındaki ilişkiyi ölçmesi gerekir. ÖKM'ler cerrahi, tıbbi veya kozmetik önemi olan yapısal anormallikler olarak tanımlanmıştır.<sup>5</sup> ÖKM gelişimi nesnel bir sonuç olarak kabul edildi.

Literatür araştırmasıyla, bu soruyla ilgili 11 makale belirlendi. Makaleler American Academy of Neurology (AAN) terapötik kanıt şeması sınıflamasına göre derecelendirildi (bkz. *Neurology*<sup>®</sup> Web site www.neurology.org'da ek e-4A). Altı çalışma Sınıf IV olarak derecelendirildiğinden dikkate alınmadı. Geri kalan çalışmalar Sınıf III ile derecelendirildi (bkz. tablo e-1).

Beş Sınıf III çalışmanın birinde (n = 156) folik asit desteği olmaması halinde ÖKM riskinin arttığı bildirilmiştir (olasılık oranı [OR] 16.88, %95 güven aralığı [CI] 4.79–59.52).<sup>6</sup> Bu çalışmada folik asit destek dozu günde 2.5–5 mg'dir. İkinci bir Sınıf III çalışmada <4.4 nmol/L'lik serum folik asit konsantrasyonlarıyla yenidoğan malformasyonu arasında anlamlı bir ilişki belirlenmiştir (düzeltilmiş OR 5.8, %95 CI 1.3–27, p = 0.02).<sup>7</sup>

Bazı Sınıf III çalışmalarda folik asit ve ÖKM arasında herhangi bir ilişki gösterilememiştir, ancak folik asit desteğine bağlı yeterli risk azalmasını dışlayacak kadar hassas da değildir. Bir çalışmada, valproat (VPA) kullanan ve folik asit desteği almayan annelerin çocuklarında ÖKM OR'sinin 1.67 olduğu bildirilmiştir. An-

cak, bulgu anlamlı değildir (%95 CI 0.62–4.50).<sup>8</sup> Başka bir çalışma ise folik asit desteğinin herhangi bir etkisini gösterememiştir (OR 0.86, %95 CI 0.34–2.15),<sup>9</sup> ancak potansiyel bir faydayı dışlayacak istatistiksel kesinliğe de sahip değildir. Son çalışma<sup>10</sup> ise müphemdir, zira bu çalışmada folik asit desteği bebeklerin ÖKM ile doğmasını engellememiştir.

**Sonuç.** EK'nin çocuklarında folik asit desteğiyle birlikte ÖKM riski muhtemelen azalır (2 yeterince hassas Sınıf III çalışma).

**Öneri.** EK'de ÖKM riskini düşürmek için prekonsepsiyonel folik asit desteği verilebilir (Düzyey C).

**Klinik bağlam.** Folik asitin bu gruba ne herhangi bir zararı olduğuna dair bir kanıt ne de etkili olduğunu düşündürecek bir neden yoktur, ama sonuçta her ne kadar EK'de etkili olduğunu düşündürecek yeterli veri olmasa da Folik asit desteği gebelik esnasında ÖKM riskini düşürmek için genelde tavsiye edilir.<sup>11</sup> Dolayısıyla ile bu kanıtın gücü epilepsisi olsun olmasın, tüm çocuk doğurma potansiyeli olan kadınlara gebelik öncesinde ve esnasında en az 0.4 mg folik asit desteği tavsiyesini etkilememelidir.<sup>12</sup> AEİ alan EK'de folik asit dozu ve daha yüksek dozların daha fazla koruyucu fayda sağlayıcını düşündürecek yeterli yayınlanmış bilgi yoktur.

**AEİ alan EK'nin yenidoğanlarında kanama hastalığı riski nedir?** Analize dahil edilebilmek için, çalışmada AEİ alan EK'nin yenidoğanlarında neonatal kanama komplikasyon riskiyle epilepsili olmayan kadınların yenidoğanlarındaki riskin karşılaştırılması gerekir. Kanama komplikasyonları doğumdan sonraki 24 saat içinde gerçekleşen herhangi bir kanama olarak tanımlanmıştır. Sadece koagülasyon faktör düzeyleri gibi kanama riski ön işaretleyicilerinin üzerinde durulduğu çalışmalar analize dahil edilmedi. Her bir çalışmada yanlılık riski AAN kanıt şeması prognostik sınıflamasıyla ölçüldü (ek e-4B).

Literatür araştırmasıyla 10 makale belirlendi. İki makale hariç tümü Sınıf IV olarak derecelendirildi. Geri kalan 2 makale, biri Sınıf II ve biri Sınıf III, tablo e-2'de özetlendi.

Bir Sınıf II makalede<sup>13</sup> sağlıklı kontrollere kıyasla enzim indükleyen AEİ alan çok sayıda annenin yenidoğanları değerlendirilmiştir. Lojistik regresyon analiziyle neonatal kanama için multipl risk faktörlerinin değerlendirilmesinde, enzim indükleyen AEİ'nin neonatal kanamayla anlamlı ilişkili olmadığı anlaşılmıştır (OR 1.1, %95 CI 0.3–4.6, p = 0.8). Ancak, %95 CI'nin üst sınırı yeterli risk olasılığının dışlanamayacağı düşündürmektedir. AEİ'ye maruz kalan yenidoğanlarda kanamaların büyük kısmı prema-

tür doğumdan (<34 hafta) sorumlu tutulmuştur. Bir Sınıf III çalışma<sup>14</sup> da, çoğu enzim indükleyici (göreceli risk 0.51, %95 CI 0.21–1.24,  $p = 0.14$ ) olan AEİ ile yüksek bir risk ortaya koymamıştır. Bu iki çalışmada tüm yenidoğanlara doğum anında vitamin K 1 mg IM yapılmış, ancak annelere prenatal vitamin K desteği verilmemiştir.

**Sonuç.** AEİ alan EK'nin yenidoğanlarında neonatal kanama komplikasyon riskinin anlamlı ölçüde arttığını düşündüren yeterli bir kanıt yoktur (1 yeterli derecede hassas olmayan Sınıf II çalışma).

**Öneri.** Gebe veya gebelik planlayan EK ile görüşürken, AEİ alan EK'nin yenidoğanlarında kanama komplikasyon riskinin arttığını destekleyecek veya reddedecek yeterli kanıt olmadığı (Düzey U) söylenmelidir.

**Prenatal vitamin K desteği AEİ alan EK'nin yenidoğanlarında kanama komplikasyon riskini düşürür mü?** Sınıf IV'ten daha iyi kanıt sağlayan hiçbir makale yoktur.

**Sonuç.** EK'de prenatal vitamin K desteğinin neonatal kanama komplikasyonlarını azalttığını düşündürecek yeterli kanıt yoktur.

**Öneri.** AEİ alan EK'nin yenidoğanlarında kanama komplikasyon riskinin düşürülmesinde prenatal vitamin K desteğinin faydasını destekleyecek veya reddedecek yeterli kanıt yoktur (Düzey U).

**Klinik bağlam.** Uterusta enzim indükleyen AEİ'ye maruz kalan yenidoğanlara, tüm yenidoğanlarda olduğu gibi, doğum anında rutin olarak vitamin K uygulanır.<sup>15</sup>

**Annenin aldığı AEİ plasentadan geçer mi? Annenin aldığı AEİ süttten geçer mi?** Araştırmacıların plasental geçişi değerlendirmek üzere en az 5 maternal serum-süt eşinde ve en az 5 anne-çocuk eşinde AEİ düzeylerini ölçtüğü makaleler seçildi. Her bir çalışmanın yanlılık riski AAN kanıt şeması prognostik sınıflaması ile derecelendirildi. Annenin serumunda AEİ düzeyi risk faktörü olarak; yenidoğanın serumunda AEİ düzeyi ilk soru için ve sütte AEİ düzeyi de ikinci soru için bir sonuç olarak kabul edildi. Çalışmaların dereceleri, doğru tanımlanmamış serum AEİ konsantrasyonları; popülasyonun genellenemesi; anneden alınan numune ve aynı eşten farklı zamanlarda alınan kort veya süt numunesi gibi numuneler aynı zamanda alınmaması veya %80'den az numunenin protokole göre toplanması nedeniyle düşürüldü.

Fetüs veya yenidoğanda klinik olarak önemli risk yarattığı bilinen AEİ'lere bilinen bir pasif

maruziyet eşik düzeyi yoktur. Bu parametre amacı için, panel 0.6'lık AEİ geçiş hızının (yenidoğan–maternal plazma konsantrasyon oranı veya süt–maternal konsantrasyon oranı) klinik olarak önemli olabileceğini öngördü. Benzer şekilde, yenidoğanda plazma konsantrasyonunun değerlendirme periyodunda (genelde 3 günden 1 aya kadar) olduğundan %25 daha fazlasına çıkmasının klinik olarak önemli olabileceğini de öngördü.

Literatür araştırmasıyla 19 makale saptandı. İki makale Sınıf I, 16'sı Sınıf II ve 1'i Sınıf III'dü (bkz. tablo e-3).

**Plasentadan geçiş.** Bir Sınıf I çalışma<sup>16</sup> ve 1 Sınıf II çalışma<sup>17</sup> pirimidon (PRM) ve fenobarbitalin (PB) plasentayı anlamlı ölçüde geçtiğini düşündüren kanıtlar sağlamıştır (kord:maternal konsantrasyon >0.6).

Bir Sınıf I çalışma<sup>18</sup> ve iki Sınıf II çalışma<sup>19,20</sup> VPA'nın plasentayı anlamlı ölçüde geçtiğini düşündüren kanıtlar sağlamıştır.

En az iki Sınıf II AEİ çalışması<sup>19–24</sup> şu AEİ'lerin plasentayı anlamlı ölçüde geçtiğini kanıtlamıştır: fenitoin (PHT), karbamazepin (CBZ) ve levitirasetam (LVT).

Bir Sınıf II çalışmada şu AEİ'lerin anlamlı plasental geçişi gösterilmiştir: gabapentin (GBP),<sup>25</sup> lamotrijin (LTG),<sup>26</sup> okskarbazepin (OXC)<sup>27</sup> ve topiramet (TPM).<sup>28</sup>

Bir Sınıf III çalışmada etosüksimidin (ESM) anlamlı plasental geçişi gösterilmiştir.<sup>29</sup>

#### Sonuçlar

- PB, PRM, PHT, CBZ, LVT ve VPA plasentadan muhtemelen klinik olarak önemli olabilecek miktarda geçer (bir Sınıf I ve destekleyici Sınıf II çalışma ya da 2 veya daha fazla Sınıf II çalışma).
- GBP, LTG, OXC ve TPM plasentayı klinik olarak önemli olabilecek düzeyde geçer (her biri en az bir Sınıf II çalışma).
- ESM'nin plasentayı klinik olarak önemli miktarda geçip geçmediği düşündürecek yeterli veri yoktur (bir Sınıf III çalışma anlamlı geçiş gösterir).

**Öneriler.** PB, PRM, PHT, CBZ, LVT, VPA, GBP, LTG, OXC ve TPM'nin plasentayı geçtiği gerçeği, epilepsili bir kadında AEİ tedavisi klinik kararını etkileyebilir (PB, PRM, PHT, CBZ, LVT ve VPA için Düzey B ve GBP, LTG, OXC ve TPM için Düzey C).

**Süttten geçiş.** Bir Sınıf I çalışma<sup>16</sup> ve bir Sınıf II çalışma<sup>17</sup> PRM'nin süte anlamlı geçişini göstermiştir.

İki Sınıf II çalışma<sup>23,24</sup> LVT'nin süte anlamlı geçişini göstermiştir.

Bir Sınıf II çalışma aşağıdaki her bir AEİ'nin süte anlamlı ölçüde geçişini göstermiştir: GBP,<sup>25</sup> LTG<sup>26</sup> ve TPM.<sup>28</sup>

Bir Sınıf III çalışma ESM'nin süte anlamlı geçişini göstermiştir.<sup>29</sup>

Bir Sınıf I çalışma<sup>18</sup> ve destekleyici bir Sınıf II çalışma<sup>30</sup> VPA'nın süte anlamlı ölçüde geçmediğini göstermiştir.

Bir Sınıf I çalışma<sup>16</sup> ve bir Sınıf II çalışma<sup>17</sup> PB'nin süte anlamlı ölçüde geçmediğini göstermiştir.

AEİ başına ikişer Sınıf II çalışma CBZ<sup>31,32</sup> ve PHT'nin<sup>33,34</sup> süte ciddi ölçüde geçmediğini göstermiştir.

Yenidoğanlarda, PB dahil herhangi bir AEİ'nin sürekli birikimini gösteren yeterli veri yoktur.

#### Sonuçlar

- PRM ve LVT süte klinik olarak önemli olabilecek düzeyde geçer (bir Sınıf I çalışma ve destekleyici bir Sınıf II çalışma veya iki Sınıf II çalışma).
- GBP, LTG ve TPM süte klinik olarak önemli olabilecek düzeyde geçer (her biri için bir Sınıf II çalışma).
- VPA, PB, PHT ve CBZ süte klinik olarak önemli olabilecek düzeyde geçmez (bir Sınıf I çalışma ve destekleyici bir Sınıf II çalışma veya bir Sınıf II çalışma).
- ESM'nin süte anlamlı geçişine işaret edecek yeterli veri yoktur (bir Sınıf III çalışma anlamlı geçiş göstermiştir).

**Öneriler.** VPA, PB, PHT ve CBZ'nin süte PRM, LVT, GBP, LTG ve TPM kadar geçmediği kabul edilebilir (PRM ve LVT ile kıyaslandığında Düzey B ve GBP, LTG ve TPM ile kıyaslandığında Düzey C).

**Klinik bağlam.** Küçük örneklem boyutu nedeniyle, AEİ politerapisi gibi diğer klinik faktörlerin EK'nin yenidoğanlarına pasif AEİ geçişine potansiyel katkılarını analiz etmenin bir yolu yoktur.

Annenin aldığı AEİ'ye dolaylı maruziyetin yenidoğanlara semptomatik etkisi var mıdır? İlgili semptomatik etkileri, muhtemelen AEİ'ye atfedilebilir olanlar olarak tanımladık (örn., geri çekilme, yatıştırılmayan telaş, aşırı sedasyon, letarji). Bu tür belirtilerin AEİ alan EK'nin yenidoğanlardaki sıklığını AEİ almayan EK'nin yenidoğanlardaki sıklığıyla karşılaştıran kontrollü çalışma olup olmadığını araştırdık. Herhangi bir makaleye rastlamadık.

**Sonuç.** Yenidoğanlarda, annenin aldığı AEİ'ye dolaylı maruziyetin semptomatik etkile-

ri olduğunu düşündürecek herhangi bir kanıt yoktur.

**Öneri.** Yok (Düzey U).

**Klinik bağlam.** Kesinlikle birçok AEİ plasentadan veya süten ölçülebilir konsantrasyonlarda geçer, AEİ'nin süte geçişinde özellikle bazı anlamlı farklılıklar vardır. Süt yoluyla AEİ alan yenidoğanlarda klinik sonuçlar araştırılmamıştır ve gebe EK'de ve bakım verenlerde bu klinik ikili anksiyete yaratmaya devam edecektir.

Her bir AEİ için, gebelik ilaç düzeylerinde veya klirensinde bir değişim yapar mı? Araştırmacıların gebelik öncesi ve postpartum AEİ düzeylerinin karşılaştırıldığı makaleler analize dahil edildi. Makaleler prognostik makale kanıtına göre sınıflandırıldı (ek e-4B). Bu şemayla, gebelik bir gösterge ve serum ilaç düzeyleri veya ilaç klirensindeki değişim de birer sonuç olarak kabul edildi.

Serum AEİ düzey assayları nesnel bir sonuç olarak kabul edildi. Ancak, assayın teknik güvenilirliği ve hata marjini ile ilgili diğer endişeler potansiyel yanlışlık kaynakları olarak kabul edildi ve çalışmanın derecesi buna bağlı olarak düşürüldü. Ayrıntılı örneklem istenmedi, ancak farklı örneklem zamanları derecenin düşürülme nedeni olarak kabul edildi. Altı haftadan uzun postpartum değerleri bir gebelik öncesi başlangıç tahmini olarak kabul edildi. Politerapi kullanan EK'de, diğer AEİ dozlarının aynı tutulduğunun açıkça belirtilmesi halinde, tek bir AEİ düzeyindeki değişimler kaydedildi. Politerapi kullanan EK'yi içeren makalelerin derecesi düşürüldü.

AEİ düzey veya klirensinde hiçbir özel değişim boyutu klinik olarak önemli kabul edilmedi. Ancak panelin amacı, nöbet frekansındaki artışın AEİ düzeylerinde gebeliğe bağlı azalmayla ilişkili olduğunu gösterecek bir kanıt bulmaktı.

Literatür araştırmasıyla ilgili 31 makale saptandı. Aynı zamanda, 1985'ten önce yayımlanan sadece 3 makale analiz edildi, çünkü yalnızca bazı eski AEİ'ler hakkında mevcut bilgiler sağlamaktaydılar. AEİ düzey assay teknolojisi son 10 yıldan beri belli kalıplara sokulduğundan, bu kabul edilebilir bir durumdur. Üç makale Sınıf I, beşi Sınıf II ve yirmi üçü Sınıf III olarak sınıflandırıldı. Her bir AEİ için, sadece yorumları değiştirebilecek en küçük yanlışlık riskine sahip makaleler kanıt tablosuna dahil edildi (bkz. tablo e-4-e-8).

**Lamotrijin.** Bir Sınıf I çalışma<sup>35</sup> LTG'nin hem total hem de serbest klirensinin gebelik boyunca arttığını ve 3. trimesterde %94'lük (total) ve %89'lük (serbest) zirveler yaptığını göstermiştir. LTG düzeyi gebelik öncesi bireysel hedef LTG konsantrasyonunun %65'ine düştüğünde

nöbet frekansı artar. İki Sınıf II çalışma<sup>36,37</sup> da LTG klirensinde bir artış olduğunu ispatlamaktadır. Bir çalışma<sup>36</sup> gebelik öncesi düzey ile ikinci ve üçüncü trimesterler arasında klirenste  $> \%65$  artış göstermiştir. İkinci çalışma<sup>37</sup> 32. haftaya kadar LTG klirensinin arttığını, gebelik öncesi düzeyin  $\%230$ 'una ulaştığını ortaya koymuştur. Bu 3 çalışma da bireylerde artmış LTG klirens boyutunda yeterli değişkenlik olduğunu göstermiştir.

**Sonuç.** Gebelik LTG klirensinde muhtemel bir artışa ve düzeyde düşüşe neden olur. LTG düzeyindeki düşüş nöbet frekansındaki artışla birlikte (bir Sınıf I ve iki Sınıf II çalışma).

**Karbamazepin.** Gebelik esnasında CBZ kullanan 35 kadınla yapılan bir Sınıf I çalışma,<sup>38</sup> total CBZ konsantrasyonunun 2. trimesterde başlangıca göre  $\%9$  ve 3. trimesterde  $\%12$  düştüğünü belgelemiştir. Ancak, serbest CBZ düzeyleri başlangıca göre gebelik esnasında anlamlı değişim göstermez. Total ve serbest CBZ-epoksit konsantrasyonları değişmez. İki Sınıf III çalışmada<sup>39,40</sup> gebelik esnasında hafif bir klirens artışı gösterilmiştir ( $\%10-27.5$ ), ancak bu sadece enzim indükleyici AEİ politerapisi altındaki kadınlarda sonuçları değiştirmiştir.<sup>40</sup> Bir çalışmada<sup>39</sup> gebelik esnasında CBZ epoksit düzeylerinde ve epoksit:CBZ oranında artış bildirilmiştir.

**Sonuç.** Gebelik, CBZ konsantrasyonunda muhtemelen küçük bir düşüşe neden olur (2. trimesterde başlangıca göre  $\%9$  ve 3. trimesterde  $\%12$ ) (bir Sınıf I çalışma).

**Fenitoin.** PHT monoterapisi altındaki 22 kadınla yapılan bir Sınıf I çalışma<sup>38</sup> total PHT konsantrasyonunun üç trimesterde de başlangıca göre azaldığını (maksimum  $\%61$ ) göstermiştir. Serbest PHT konsantrasyonu 3. trimesterde  $\%16$  azalır. PHT serbest fraksiyonu 2. ve 3. trimesterlerde maksimum  $\%40$  yükselir. Plazma PHT klirensi üç trimesterde de başlangıca göre  $\%117$ 'ye kadar artar. Serbest PHT klirensi 3. trimesterde  $\%25$  artar. Üç Sınıf II çalışma<sup>e1-e3</sup> da gebelik esnasında klirensin arttığını ve düzeylerin düştüğünü ortaya koymuştur.

**Sonuç.** Gebelik, PHT klirensinde muhtemel artışa ve düzeyinde azalmaya neden olur (bir Sınıf I çalışma).

**Okskarbazepin.** İki Sınıf III çalışmada<sup>e4,e5</sup> OXC'nin aktif metaboliti olan monohidroksi türevi (MHD) düzeylerinde bir düşüş gözlenmiştir. Bir çalışma<sup>e5</sup> MHD konsantrasyonunda, maksimum 2. trimesterde olmak üzere,  $\%61.5$ 'lik bir ortalama düşüş göstermiştir. Diğer bir çalışmaya göre,<sup>e4</sup> gebelik öncesine kıyasla, ortalama doza göre düzeltilmiş MHD konsantrasyonunda 1. trimesterde  $\%28$ , 2. trimesterde  $\%26$  ve 3. trimesterde  $\%36$  düşüş gerçekleşir.

**Sonuç.** Gebelik, aktif OXC metaboliti olan MHD düzeyinde bir düşüşe neden olur (iki Sınıf III çalışma).

**Levetirasetam.** Bir Sınıf II çalışma<sup>23</sup> gebelik esnasında LVT konsantrasyonlarının düştüğünü göstermiştir; maternal plazma konsantrasyonları 3. trimester esnasında gebelik öncesine göre  $\%60$  düşer.

**Sonuç.** Gebelikte birlikte LVT düzeyinde muhtemel bir düşüş olur (bir Sınıf II çalışma).

**Fenobarbital, valproat, pirimidon ve etosüksimid.** Gebelik esnasında PB, VPA, PRM ve ESM düzey veya klirensinin değiştiğini düşünebilecek yeterli monoterapi verisi yoktur.

**Sonuç.** Gebelik esnasında PB, VPA, PRM ve ESM düzey veya klirensinin değiştiğini düşünebilecek kanıtlar, bir yorum yapılmasına yeterli değildir.

#### Öneriler

- Gebelik esnasında LTG, CBZ ve PHT düzeyleri monitorize edilmelidir (Düzy B).
- Gebelik esnasında LVT ve OXC (MHD olarak) düzeyleri monitorize edilebilir (Düzy C).
- PB, VPA, PRM ya da ESM düzeylerinde gebelik ile ilgili değişimi destekleyecek veya reddedecek yeterli kanıt yoktur (Düzy U), ancak bu kanıt yokluğu bu AEİ düzeylerinin gebelik esnasında monitorize edilmeyeceği anlamına gelmemelidir.

**KLİNİK BAĞLAM** Çalışmaların bu derlemesi, gebelik esnasında AEİ düzeylerinin aktif monitorizasyonunu destekleyen bazı kanıtlar sağlamıştır. Bu durum özellikle LTG için önemlidir, LTG düzeyindeki değişimler nöbet frekansındaki artışla ilişkilidir. Bu takibi, düzeyi epilepsinin kontrol altında tutulabildiği gebelikten hemen önceki düzeyde tutma amacıyla, her bir hasta düzeyinde düşünmek daha mantıklıdır. Ancak, gözden geçirilen çalışmalar, aktif bir AEİ monitorizasyon programı uygulamasının gebelik esnasında nöbet kontrolünü düzelterek söylemek için yeterli değildir.

Ne yazık ki, gözden geçirilen çalışmalar gebelik sonrasında gebelik öncesi farmakokinetik duruma geçiş zamanı hakkında yeterli veri sunmamıştır. Bir çalışma<sup>35</sup> LTG'nin ampirik bir postpartum doz azaltma şemasının postpartum toksisiteyi düşürdüğünü ortaya koymuştur, ancak postpartum periyotta tüm AEİ'lerin doz yönetimine karar vermek için postpartum AEİ metabolizmasındaki farmakokinetik değişikliklere yönelik daha fazla sistematik bilgiye ihtiyaç vardır.

**GELECEK ARAŞTIRMALAR İÇİN TAVSİYELER** EK'de gebelik öncesi (prekonsepsiyonal) folik asit desteğinin, özellikle yüksek dozlarda, ÖKM'nin önlenmesinde ek fayda sağlayıp sağlamadığı açıklığa kavuşturulmalıdır. Benzer şekilde, AEİ alan EK'nin yenidoğanlarda kanama hastalığı riski ve geç gebelik dönemi vitamin K desteğinin yararlı olup olmadığı da belirlenmelidir. Zonisamid veya TPM gibi bazı sık kullanılan AEİ'lerle yapılan çalışmalar sınırlı olduğundan, bu özel ilaçlara yönelik tavsiyelerde bulunulamamaktadır.

Her ne kadar birçok AEİ'nin plasentadan veya sütte geçtiği gösterilmişse de, çalışmalar süresine açısından kısıtlıdır ve yenidoğandaki belirtileri sistematik olarak değerlendirmemişlerdir; maruz kalmış yenidoğanlarda akut ve uzamış sonuçlarla ilgili daha fazla tanımlanmış çalışmaya ihtiyaç vardır. Bu, özellikle kognisyon ve genel sağlıklı gelişim gibi daha aşikar yan etkiler için önemlidir. Doza ve anne ve bebekte klinik monitorizasyona kılavuzluk etmesi için, AEİ düzeylerinin gebelik esnasında bireysel metabolik kapasiteye göre değişmesi yanında süren geçen AEİ'nin yenidoğan metabolizması hakkında daha fazla bilgiye ihtiyaç vardır.

#### YAZARLARIN BAĞLI BULUNDUĞU KURULUŞLAR

University of Miami (C.L.H.), Miami, FL; Emory University (P.B.P., K.J.M.), Atlanta, GA; New York Medical College (B.S.K.), New York; University of Tennessee Health Science Center (C.A.H.), Memphis; University of Wisconsin-Madison School of Pharmacy (B.G.); University of Maryland (J.H., T.Y.T., A.K.), Baltimore; Columbia University (W.A.H.), New York, NY; Centers for Disease Control and Prevention (D.T.), Atlanta, GA; Johns Hopkins University (P.W.K.), Baltimore, MD; Harvard Medical School (J.N.R., L.H.), Boston, MA; New York University School of Medicine (J.A.F.), New York; University of Calgary (S.W.), Alberta, Kanada; özel araştırmalar (A.N.W.), Newport, RI; New York University (B.V.), New York; Texas A&M University Health Science Center (R.F.), Houston; Beth Israel Deaconess Medical Center (P.O.S.), Boston, MA ve University of Pennsylvania (C.L.), Philadelphia.

#### TEŞEKKÜR

Yazarlar Laura Moses'e bu yazının hazırlanmasındaki yardımları için teşekkür ederler.

#### BEYAN

Yazarlar şu çıkar çatışmalarını bildirmiştir: Dr. Harden Cyberonics, GlaxoSmithKline, UCB Pharma, Valeant ve SK Pharmaceuticals'ın bilimsel tavsiye kurullarında ve GlaxoSmithKline, Pfizer, UCB Pharma ve Abbott'un konuşmacı bürolarında çalışmaktadır. *Epilepsy Currents*'in editörlüğünü yapmaktadır ve Elsevier'den telif ücreti almaktadır. Dr. Harden, Forest, UCB Pharma, Ortho McNeil ve NIH/NINDS'den araştırma fonu almaktadır. Dr. Harden polikliniğinde epilepsili kadınları muayene etmektedir. Dr. Pennell UCB Pharma'nın sponsorluğunda Keppra Pregnancy Registry için Uzman Paneli'nde çalışmaktadır. Northeast Regional Epilepsy Group'dan 2008 Epilepsy Symposium'da konuşması için seyahat ücreti, UK Research Council'den Epilepsy Research UK International Expert Workshop'da konuşması, UCB Pharma'dan Executive Panel meeting for the Pregnancy Registry'e katılımı, American Epilepsy Society'den Board of Directors' Meeting'e katılımı, Epilepsy Foundation'dan Board of Directors' and orienta-

tion meetings'e katılımı, Long Island Jewish Hospital'den Neurology Grand Rounds'da ders vermesi, Duke University'den Neurology Grand Rounds'da ders vermesi, Brigham and Women's Hospital'den Epilepsy Research Conference'de ders vermesi, Milken foundation'dan Pregnancy Registry meetings'e katılımı ve Massachusetts General Hospital'den Annual Teratogens Course'de konuşması için ücret almıştır. Massachusetts Medical Society'den Journal Watch Neurology için bir katkı makalesi karşılığı, *NEJM* için derleme karşılığı ve *Lancet Neurology* için, Northeast Regional Epilepsy group'dan 2008 Epilepsy Symposium'da konuşması için, North Shore Long Island Jewish Health system, Duke University, University of Maryland, Massachusetts General Hospital'dan postgraduate course in Human Teratogens'de konuşması ve AAN'den konuşması ve yıllık kursları yönetmesi için honoraria almaktadır. Dr. Pennell *Epilepsy Currents* için bir yardımcı editör ve *Epilepsia*'da ise editöryal kurul üyesi olarak çalışmaktadır. Dr. Pennell UCB Pharma, Marinus Pharmaceuticals, NIH, NINDS, NIMH, CDC ve Emory University Research Council'den has araştırma desteği almaktadır. Dr. Koppel'in herhangi bir beyanı yoktur. Dr. Hovinga klinik zamanının %10'dan azını farmakoloji konsültasyonlarına ayırdığı tahmin etmektedir. Dr. Gidal GlaxoSmithKline, UCB Pharma ve Abbott Labs bilimsel tavsiye kurullarında ve *Epilepsy & Behavior*, *The Annals of Pharmacotherapy* ve *Pharmacist's Letter*'de editör olarak çalışmaktadır. Dr. Gidal UCB Pharma'dan araştırma desteği almaktadır. Dr. Meador *Neurology*, *Journal of Clinical Neurophysiology*, *Cognitive and Behavioral Neurology*, *Epilepsy & Behavior*, *Epilepsy Currents* ve *Epilepsy.com*'da dergi editörü olarak çalışmaktadır. Aynı zamanda NIH/NINDS, GlaxoSmithKline, Eisai, Marius, Myriad, Neupace, SAM Technology ve UCB Pharma'da araştırma fonu almaktadır. Dr. Meador klinik zamanının %30-40'ını EEG'ye ve epilepsi hastalarının klinik bakımına harcadığını tahmin etmektedir. Dr. Hopp UpToDate.com elektronik tip dergisinden telif ücreti almaktadır. UCB Pharma ve GlaxoSmithKline'nin konuşmacı bürolarının üyesidir. Dr. Hopp bir medikolegal vaka danışmanlık yapmıştır. Dr. Ting UCB Pharma'nın bilimsel tavsiye kurulunda çalışmakta ve Epilepsy Foundation of America'dan honoraria almaktadır. Dr. Hauser Ovation ve Valeant'ın bilimsel tavsiye kurulunda çalışmaktadır. *Acta Neurologica Scandinavica*, *Neuroepidemiology* ve *Epilepsy Research*'in editöryal kurulunda çalışmaktadır. Cornell University Symposium on epilepsy'den honoraria almış ve Pfizer için konsültanlık yapmaktadır. Dr. Hauser AAMC/CDC, NIH/NINDS, FAA, Mayo Clinic ve Hotchkiss Neurological Institute'den araştırma desteği almaktadır ve bir FAA konsültanı olarak uzman danışmanlık vermiştir. Dr. Thurman CDC'nin bir çalışmandır. Dr. Kaplan UCB Pharma, GSK ve Ortho McNeil'in konuşmacı bürolarında çalışmaktadır. *Neurophysiologie Clinique*, *Journal of Clinical Neurophysiology* ve *Epilepsia*'da yardımcı editör olarak çalışmaktadır. Demos Publications'dan *Neurological Disease in Women*, *Epilepsy A to Z*, *Imitators of Epilepsy* ve *Nonconvulsive Status Epilepticus* kitapları için telif ücreti almıştır. Medical College of South Carolina, Duke University ve Medical College of Virginia'dan konuşmacı honoraria, NIH, Schwarz, Ortho McNeil ve Pfizer'den araştırma almaktadır ve Schering-Plough ve Infinite Biological Technologies'in bir konsültanıdır. Dr. Robinson'un herhangi bir beyanı yoktur. Dr. French UCB Pharma, Johnson and Johnson, Eisai, Novartis, Valeant, Icagen, Intranasal, Sepracor ve Marinus'un bilimsel tavsiye kurulunda çalışmaktadır. Bulgularını sunmak veya ders vermek için UCB Pharma, Kyowa, Eisai, Johnson and Johnson, Valeant ve GlaxoSmithKline'den seyahat ücreti almaktadır. *Epilepsy Currents*'de yardımcı editör ve *Epileptic Disorders*'de supplement editörü olarak çalışmaktadır. Dr. French, çok sayıda ilaç şirketinden maddi destek alan (GlaxoSmithKline, UCB Pharma, Johnson and Johnson, Cyberonics, Schwarz Pharma, Ortho McNeil, Eisai, Jazz Pharmaceuticals, Ovation Pharmaceuticals, Endo Pharmaceuticals, Bial Pharmaceuticals, Neurovista, Valeant Pharmaceuticals, Icagen, Supernus, Intranasal, SK Pharmaceuticals, Taro Pharmaceuticals, Neurotherapeutics, Sepracor ve Novartis) Epilepsy Study Consortium'un başkanıdır ve konsorsiyum adına konsültasyonlar yapmaktadır. Dr. French Johnson and Johnson, Eisai, UCB Pharma, SK Pharmaceuticals, Valeant, Pfizer, NIH ve Epilepsy Research Foundation'dan araştırma fonu almaktadır. Dr. Wiebe *Neurology*, *Epilepsia*, *Epilepsy & Behavior* ve *Canadian Journal of Neurological Sciences*'in editöryal kurulunda çalışmaktadır. Dr. Wilner GlaxoSmithKline'nin bilimsel tavsiye kurulunda çalışmakta ve seyahat ücreti almaktadır. Demos Publications'dan *Epilepsy: 199 Answers* ve *Epilepsy in Clinical Practice* için telif ücreti almaktadır.

ti almıştır. GlaxoSmithKline'den direktör kurul tazminatı almaktadır. Dr. Vazquez Eisai, UCB, GSK ve Ortho McNeil bilimsel tavsiye kurullarında çalışmaktadır. UCB, GSK, Ortho McNeil ve Eisai'den honoraria almaktadır. Dr. Vazquez Eisai, GSK, Ortho McNeil, UCB ve Novartis'in konuşmacı bürolarında çalışmaktadır. Dr. Holmes Abbott Labs, Eisai, Novartis, Ortho McNeil ve Pfizer'den araştırma desteği almaktadır. Dr. Krumholz Commercial Drivers and Epilepsy Department of Transportation Uzman Panelinde ve *The Neurologist* ve *Clinical EEG and Neuroscience* editöryal kurulunda çalışmaktadır. Robert Wood Johnson Medical School'dan grand rounds için honoraria almaktadır. Dr. Finnell NEAD study at Emory University, the University of Houston Center for Life Sciences Technology, NIH ve NIEHS National Advisory Environmental Health Sciences Council bilimsel tavsiye kurullarında çalışmaktadır. Fundacion BBVA, NIEHS National Advisory Environmental Health Sciences Council, IKMC Steering Committee, European Epilepsy Meeting, NIH ve AES'den seyahat ücreti almaktadır. Dr. Finnell *Birth Defects Research Part A* için dergi editörü olarak çalışmaktadır ve folat reseptör otoantikör asayın patentini almıştır. McGill University-Montreal Neurological Institute'den honoraria almaktadır ve Centers for Disease Control and Prevention for the National Birth Defects Prevention Study ve Methodist Hospital Research Institute'den araştırma fonu almaktadır. Dr. Finnell uzman danışmanlık yapmış, affadavitler hazırlamış ve bu taslağın başlığı ile ilgili kanuni takibat açısından tanıklık yapmıştır. Bn Shafer GlaxoSmithKline'nin bilimsel tavsiye kurulunda çalışmakta, Epilepsy Therapy Project'den seyahat ücreti almaktadır ve *Epilepsy & Behavior* ve *Epilepsia* için değerlendirmecilik yapmaktadır. Medscape, American Epilepsy Society ve Cyberonics Nursing Advisory Board'dan honoraria almaktadır. Bn Shafer Epilepsy Foundation of Massachusetts and Rhode Island'ın konuşmacı bürolarında bulunmaktadır, Epilepsy Therapy Project için konsültanlık yapmaktadır ve epilepsy.com'da yardımcı yazardır. Bn Le Guen'in herhangi bir beyanı yoktur.

#### AÇIKLAMA

Bu derleme American Academy of Neurology'nin bir eğitim hizmetidir. Güncel bilimsel ve klinik bilginin gözden geçirilmesine dayalıdır. Belli bir nörolojik problemin tüm olası doğru bakım yöntemlerinin ve belli bir işlemi seçmek için tüm geçerli ölçütlerin sunulması amaçlanmamıştır. Aynı zamanda mantıklı alternatif metodolojilerin dışlanması da istenmemiştir. AAN, belli hasta bakım kararlarının tüm koşullarda hastaya ve onunla ilgilenen doktora kaldığı kabul eder. Kanıt dayalı kılavuz(lar)u güncel uygulama alışkanlıkları ve zorluklarla birlikte bir perspektife sokmak için klinik bağlam kısmı oluşturulmuştur. Hiçbir resmi uygulama tavsiyesinde bulunulmamıştır. Rapordaki bulgu ve yorumlar yazarlara aittir ve Centers for Disease Control and Prevention'in resmi duruşunu temsil etmez.

13 Ocak 2009'da alındı. Son haliyle 23 Mart 2009'da yayına kabul edildi.

#### KAYNAKLAR

1. United States Department of Health and Human Services, Centers for Disease Control and Prevention, National Center for Health Statistics, Bridged-Race Population Estimates, United States. July 1st resident population by state, county, age, sex, bridged-race, and Hispanic origin on CDC WONDER On-line Database. Available at: <http://wonder.cdc.gov>. Accessed June 2008.
2. Hirtz D, Thurman DJ, Gwinn-Hardy K, et al. How common are the "common" neurologic disorders? *Neurology* 2007;68:326–337.
3. Yerby MS. Quality of life, epilepsy advances, and the evolving role of anticonvulsants in women with epilepsy. *Neurology* 2000;55:S21–31.
4. Harden CL, Hopp J, Ting TY, et al. Practice Parameter update: management issues for women with epilepsy—focus on pregnancy (an evidence-based review): obstetrical complications and change in seizure frequency: report of the Quality Standards Subcommittee and Therapeutics and Technology Assessment Subcommittee of the American Academy of Neurology and American Epilepsy Society. *Neurology* 2009;73:126–132.
5. Holmes LB, Harvey EA, Coull BA, et al. The teratogenicity of anticonvulsant drugs. *N Engl J Med* 2001;344:1132–1138.
6. Betts T, Fox C. Proactive preconception counseling for women with epilepsy: is it effective? *Seizure* 1999;8:322–327.
7. Kaaja E, Kaaja R, Hiilesmaa V. Major malformations in offspring of women with epilepsy. *Neurology* 2003;60:575–579.
8. Vajda FJ, O'Brien TJ, Hitchcock A, et al. The Australian registry of anti-epileptic drugs in pregnancy: experience after 30 months. *J Clin Neurosci* 2003;10:543–549.
9. Vajda FJ, O'Brien TJ, Hitchcock A, et al. Critical relationship between sodium valproate dose and human teratogenicity: results of the Australian register of anti-epileptic drugs in pregnancy. *J Clin Neurosci* 2004;11:854–858.
10. Wyszynski DF, Nambisan M, Surve T, Alsdorf RM, Smith CR, Homes LB. Increased rate of major malformations in offspring exposed to valproate during pregnancy. *Neurology* 2005;64:961–965.
11. Czeizel AE, Dobó M, Vargha P. Hungarian cohort-controlled trial of periconceptional multivitamin supplementation shows a reduction in certain congenital abnormalities. *Birth Defects Res A Clin Mol Teratol* 2004;70:853–861.
12. Recommendations for the use of folic acid to reduce the number of cases of spina bifida and other neural tube defects. *Morb Mortal Wkly Rep* 1992; September 11/41(RR-14):001.
13. Kaaja E, Kaaja R, Matila R, Hiilesmaa V. Enzyme-inducing antiepileptic drugs in pregnancy and the risk of bleeding in the neonate. *Neurology* 2002;58:549–553.
14. Chouliska S, Grabowski, Holmes LB. Is antenatal vitamin K prophylaxis needed for pregnant women taking anticonvulsants? *Am J Obstet Gynecol* 2004;190:882–883.
15. American Academy of Pediatrics Vitamin K Ad Hoc Task Force. Controversies concerning vitamin K and the newborn. *Pediatrics* 1993;91:1001–1003.
16. Kuhn W, Koch S, Helge H, Nau H. Primidone and phenobarbital during lactation period in epileptic women: total and free drug levels in the nursed infants and their effects on neonatal behavior. *Dev Pharmacol Ther* 1988;11:147–154.
17. Nau H, Rating D, Häuser I, Jäger E, Koch S, Helge H. Placental transfer and pharmacokinetics of primidone and its metabolites phenobarbital, PEMA and hydroxyphenobarbital in neonates and infants of epileptic mothers. *Eur J Clin Pharmacol* 1980;18:31–42.
18. Nau H, Rating D, Koch S, Hauser I, Helge H. Valproic acid and its metabolites: Placental transfer, neonatal pharmacokinetics, transfer via mother's milk and clinical status in neonates of epileptic mothers. *J Pharmacol Exp Ther* 1981;219:768–777.
19. Takeda A, Okada H, Tanaka H, et al. Protein binding of four antiepileptic drugs in maternal and umbilical cord serum. *Epilepsy Res* 1992;13:147–151.
20. Ishizaki T, Yokochi K, Chiba K, et al. Placental transfer of anticonvulsants (phenobarbital, phenytoin, valproic acid) and elimination from neonates. *Pediatr Pharmacol* 1981;1:291–303.

21. Gomita Y, Furuno K, Akaki Y, et al. Phenobarbital in sera of epileptic mothers and their infants. *Am J Ther* 1995;2: 968–971.
22. Yerby MS, Friel PN, McCormick K, et al. Pharmacokinetics of anticonvulsants in pregnancy: alterations in plasma protein binding. *Epilepsy Res* 1990;5:223–228.
23. Tomson T, Palm R, Ka'llén K, et al. Pharmacokinetics of levetiracetam during pregnancy, delivery, in the neonatal period, and lactation. *Epilepsia* 2007;48:1111–1116.
24. Johannessen SI, Helde G, Brodtkorb E. Levetiracetam concentrations in serum in breast milk at birth and during lactation. *Epilepsia* 2005;46:775–777.
25. Ohman I, Vitols S, Tomson T. Pharmacokinetics of gabapentin during delivery, in the neonatal period and lactation: does fetal accumulation occur during pregnancy? *Epilepsia* 2005;46:1621–1624.
26. Ohman I, Vitols S, Tomson T. Lamotrigine in pregnancy: pharmacokinetics during delivery, in the neonate, and during lactation. *Epilepsy* 2000;41:709–713.
27. Myllynen P, Pienimäki P, Jouppila P, et al. Transplacental passage of oxcarbazepine and its metabolites in vivo. *Epilepsia* 2001;42:1482–1485.
28. Ohman I, Vitols S, Luef G, et al. Topiramate kinetics during delivery, lactation, and in the neonate: Preliminary observations. *Epilepsia* 2002;43:1157–1160.
29. Kuhnz W, Koch S, Jakob S, Hartmann A, Helge H, Nau H. Ethosuximide in epileptic women during pregnancy and lactation period: Placental transfer, serum concentrations in nursed infants and clinical status. *Br J Clin Pharmacol* 1984;18:671–677.
30. Nau H, Helge H, Luck W. Valproic acid in the perinatal period: decreased maternal serum protein binding results in fetal accumulation and neonatal displacement of the drug and some metabolites. *J Pediatr* 1984;104:627–634.
31. Froescher W, Eichelbaum M, Niesen M, et al. Carbamazepine levels in breast milk. *Ther Drug Monit* 1984;6:266–271.
32. Kuhnz W, Jäger-Roman E, Rating D, et al. Carbamazepine and carbamazepine-10, 11-epoxide during pregnancy and postnatal period in epileptic mothers and their nursed infants: clinical and pharmacokinetic effects. *Pediatr Pharmacol* 1983;3:199–208.
33. Mirkin BL. Diphenylhydantoin: placental transfer, fetal localization, neonatal metabolism and possible teratogenic effects. *J Pediatr* 1971;78:329–337.
34. Steen B, Rane A, Lonnerholm G, et al. Phenytoin excretion in human breast milk and plasma levels in nursed infant. *Ther Drug Monit* 1982;4:331–334.
35. Pennell PB, Peng L, Newport DJ, et al. Lamotrigine in pregnancy: clearance, therapeutic drug monitoring, and seizure frequency. *Neurology* 2008;70:2130–2136.
36. Tran TA, Leppik IE, Blesi K, et al. Lamotrigine clearance during pregnancy. *Neurology* 2002;59:251–255.
37. Pennell P, Newport DJ, Stow ZN, et al. The impact of pregnancy and childbirth on the metabolism of lamotrigine. *Neurology* 2004;62:292–295.
38. Tomson T, Lindbom U, Ekqvist B, et al. Epilepsy and pregnancy: a prospective study of seizures control in relation to free and total plasma concentrations of carbamazepine and phenytoin. *Epilepsia* 1994;35:122–130.
39. Battino D, Binelli S, Bossi L, et al. Plasma concentrations of carbamazepine and carbamazepine 10, 11-epoxide during pregnancy and after delivery. *Clin Pharmacokinet* 1985;10:279–284.
40. Bernus I, Hooper WD, Dickinson RG, et al. Metabolism of carbamazepine and co-administered anticonvulsants during pregnancy. *Epilepsy Res* 1995;21:65–75.
